# Supplementary material for: A Hydro-Economic Model for Water Level Fluctuations: Combining Limnology with Economics for Sustainable Development of Hydropower
Source: PubMed Central journal article supplement (PMC4272295; doi:10.1371/journal.pone.0114889), 2014-12-19
Supplement: pone.0114889.s005.pdf [file pone.0114889.s005.pdf]

## S5. Data on inflows and energy prices used in the hydro-economic model

| Date [DDMMYYYY] | Energy Prices (S1 & S2) [CHF/Mwh] - Swissix spot market day peak prices | Energy Prices (S3) [CHF/Mwh] - Swissix spot market day peak prices | Date [DDMMYYYY] | Inflows (S1 & S3) [m <sup>3</sup> /day] | Inflows (S2) [m <sup>3</sup> /day] |
|-----------------|-------------------------------------------------------------------------|--------------------------------------------------------------------|-----------------|-----------------------------------------|------------------------------------|
| 01.10.2010      | 76.45                                                                   | 76.45                                                              | 01.10.2011      | 169344                                  | 88992                              |
| 02.10.2010      | 62.15                                                                   | 51.43                                                              | 02.10.2011      | 169344                                  | 88992                              |
| 03.10.2010      | 52.10                                                                   | 43.12                                                              | 03.10.2011      | 169344                                  | 88992                              |
| 04.10.2010      | 72.71                                                                   | 72.71                                                              | 04.10.2011      | 169344                                  | 88992                              |
| 05.10.2010      | 73.21                                                                   | 73.21                                                              | 05.10.2011      | 169344                                  | 88992                              |
| 06.10.2010      | 72.06                                                                   | 72.06                                                              | 06.10.2011      | 169344                                  | 88992                              |
| 07.10.2010      | 71.22                                                                   | 71.22                                                              | 07.10.2011      | 169344                                  | 53568                              |
| 08.10.2010      | 68.72                                                                   | 68.72                                                              | 08.10.2011      | 169344                                  | 53568                              |
| 09.10.2010      | 67.20                                                                   | 67.20                                                              | 09.10.2011      | 169344                                  | 53568                              |
| 10.10.2010      | 53.63                                                                   | 44.38                                                              | 10.10.2011      | 169344                                  | 53568                              |
| 11.10.2010      | 73.32                                                                   | 73.32                                                              | 11.10.2011      | 169344                                  | 53568                              |
| 12.10.2010      | 80.26                                                                   | 80.26                                                              | 12.10.2011      | 169344                                  | 53568                              |
| 13.10.2010      | 81.49                                                                   | 81.49                                                              | 13.10.2011      | 169344                                  | 53568                              |
| 14.10.2010      | 80.34                                                                   | 80.34                                                              | 14.10.2011      | 169344                                  | 53568                              |
| 15.10.2010      | 82.87                                                                   | 97.17                                                              | 15.10.2011      | 169344                                  | 53568                              |
| 16.10.2010      | 77.58                                                                   | 77.58                                                              | 16.10.2011      | 169344                                  | 53568                              |
| 17.10.2010      | 69.18                                                                   | 69.18                                                              | 17.10.2011      | 169344                                  | 53568                              |
| 18.10.2010      | 91.02                                                                   | 106.72                                                             | 18.10.2011      | 169344                                  | 53568                              |
| 19.10.2010      | 89.98                                                                   | 105.50                                                             | 19.10.2011      | 169344                                  | 53568                              |
| 20.10.2010      | 94.03                                                                   | 110.25                                                             | 20.10.2011      | 169344                                  | 53568                              |
| 21.10.2010      | 102.52                                                                  | 120.20                                                             | 21.10.2011      | 169344                                  | 53568                              |
| 22.10.2010      | 90.00                                                                   | 105.53                                                             | 22.10.2011      | 169344                                  | 53568                              |
| 23.10.2010      | 80.54                                                                   | 80.54                                                              | 23.10.2011      | 169344                                  | 53568                              |
| 24.10.2010      | 79.00                                                                   | 79.00                                                              | 24.10.2011      | 169344                                  | 53568                              |
| 25.10.2010      | 96.08                                                                   | 112.66                                                             | 25.10.2011      | 169344                                  | 53568                              |
| 26.10.2010      | 99.19                                                                   | 116.30                                                             | 26.10.2011      | 169344                                  | 53568                              |
| 27.10.2010      | 92.99                                                                   | 109.03                                                             | 27.10.2011      | 169344                                  | 53568                              |
| 28.10.2010      | 96.46                                                                   | 113.09                                                             | 28.10.2011      | 169344                                  | 53568                              |
| 29.10.2010      | 83.16                                                                   | 97.51                                                              | 29.10.2011      | 169344                                  | 53568                              |
| 30.10.2010      | 62.70                                                                   | 51.88                                                              | 30.10.2011      | 169344                                  | 53568                              |
| 31.10.2010      | 52.37                                                                   | 43.33                                                              | 31.10.2011      | 169344                                  | 53568                              |
| 01.11.2010      | 58.93                                                                   | 48.77                                                              | 01.11.2011      | 88992                                   | 53568                              |
| 02.11.2010      | 73.31                                                                   | 73.31                                                              | 02.11.2011      | 88992                                   | 53568                              |
| 03.11.2010      | 80.36                                                                   | 80.36                                                              | 03.11.2011      | 88992                                   | 53568                              |
| 04.11.2010      | 69.28                                                                   | 69.28                                                              | 04.11.2011      | 88992                                   | 53568                              |
| 05.11.2010      | 81.02                                                                   | 81.02                                                              | 05.11.2011      | 88992                                   | 53568                              |
| 06.11.2010      | 74.99                                                                   | 74.99                                                              | 06.11.2011      | 88992                                   | 53568                              |
| 07.11.2010      | 68.57                                                                   | 68.57                                                              | 07.11.2011      | 88992                                   | 43200                              |
| 08.11.2010      | 83.17                                                                   | 97.52                                                              | 08.11.2011      | 88992                                   | 43200                              |

|            |        |        |            |       |       |
|------------|--------|--------|------------|-------|-------|
| 09.11.2010 | 80.54  | 80.54  | 09.11.2011 | 88992 | 43200 |
| 10.11.2010 | 81.18  | 81.18  | 10.11.2011 | 88992 | 43200 |
| 11.11.2010 | 79.48  | 79.48  | 11.11.2011 | 88992 | 43200 |
| 12.11.2010 | 76.45  | 76.45  | 12.11.2011 | 88992 | 43200 |
| 13.11.2010 | 71.58  | 71.58  | 13.11.2011 | 88992 | 43200 |
| 14.11.2010 | 46.56  | 38.53  | 14.11.2011 | 88992 | 43200 |
| 15.11.2010 | 77.39  | 77.39  | 15.11.2011 | 88992 | 43200 |
| 16.11.2010 | 79.25  | 79.25  | 16.11.2011 | 88992 | 43200 |
| 17.11.2010 | 76.51  | 76.51  | 17.11.2011 | 88992 | 43200 |
| 18.11.2010 | 78.88  | 78.88  | 18.11.2011 | 88992 | 43200 |
| 19.11.2010 | 74.70  | 74.70  | 19.11.2011 | 88992 | 43200 |
| 20.11.2010 | 70.33  | 70.33  | 20.11.2011 | 88992 | 43200 |
| 21.11.2010 | 57.82  | 47.84  | 21.11.2011 | 88992 | 43200 |
| 22.11.2010 | 77.89  | 77.89  | 22.11.2011 | 88992 | 43200 |
| 23.11.2010 | 81.04  | 81.04  | 23.11.2011 | 88992 | 43200 |
| 24.11.2010 | 84.80  | 99.43  | 24.11.2011 | 88992 | 43200 |
| 25.11.2010 | 85.64  | 100.42 | 25.11.2011 | 88992 | 43200 |
| 26.11.2010 | 86.57  | 101.50 | 26.11.2011 | 88992 | 43200 |
| 27.11.2010 | 79.24  | 79.24  | 27.11.2011 | 88992 | 43200 |
| 28.11.2010 | 73.10  | 73.10  | 28.11.2011 | 88992 | 43200 |
| 29.11.2010 | 88.51  | 103.78 | 29.11.2011 | 88992 | 43200 |
| 30.11.2010 | 88.39  | 103.64 | 30.11.2011 | 88992 | 43200 |
| 01.12.2010 | 87.71  | 102.84 | 01.12.2011 | 53568 | 43200 |
| 02.12.2010 | 95.75  | 112.26 | 02.12.2011 | 53568 | 43200 |
| 03.12.2010 | 94.80  | 111.15 | 03.12.2011 | 53568 | 43200 |
| 04.12.2010 | 85.20  | 99.90  | 04.12.2011 | 53568 | 43200 |
| 05.12.2010 | 81.06  | 81.06  | 05.12.2011 | 53568 | 43200 |
| 06.12.2010 | 88.85  | 104.17 | 06.12.2011 | 53568 | 43200 |
| 07.12.2010 | 95.58  | 112.07 | 07.12.2011 | 53568 | 43200 |
| 08.12.2010 | 89.51  | 104.95 | 08.12.2011 | 53568 | 40608 |
| 09.12.2010 | 85.36  | 100.08 | 09.12.2011 | 53568 | 40608 |
| 10.12.2010 | 84.47  | 99.04  | 10.12.2011 | 53568 | 40608 |
| 11.12.2010 | 75.11  | 75.11  | 11.12.2011 | 53568 | 40608 |
| 12.12.2010 | 76.62  | 76.62  | 12.12.2011 | 53568 | 40608 |
| 13.12.2010 | 94.16  | 110.41 | 13.12.2011 | 53568 | 40608 |
| 14.12.2010 | 99.29  | 116.42 | 14.12.2011 | 53568 | 40608 |
| 15.12.2010 | 104.82 | 122.90 | 15.12.2011 | 53568 | 40608 |
| 16.12.2010 | 95.89  | 112.43 | 16.12.2011 | 53568 | 40608 |
| 17.12.2010 | 94.62  | 110.94 | 17.12.2011 | 53568 | 40608 |
| 18.12.2010 | 84.96  | 99.62  | 18.12.2011 | 53568 | 40608 |
| 19.12.2010 | 75.22  | 75.22  | 19.12.2011 | 53568 | 40608 |
| 20.12.2010 | 83.96  | 98.45  | 20.12.2011 | 53568 | 40608 |
| 21.12.2010 | 90.11  | 105.65 | 21.12.2011 | 53568 | 57888 |
| 22.12.2010 | 84.66  | 99.26  | 22.12.2011 | 53568 | 57888 |
| 23.12.2010 | 81.32  | 81.32  | 23.12.2011 | 53568 | 57888 |
| 24.12.2010 | 61.16  | 50.61  | 24.12.2011 | 53568 | 57888 |
| 25.12.2010 | 57.32  | 47.44  | 25.12.2011 | 53568 | 57888 |

|            |       |        |            |       |       |
|------------|-------|--------|------------|-------|-------|
| 26.12.2010 | 74.17 | 74.17  | 26.12.2011 | 53568 | 57888 |
| 27.12.2010 | 83.24 | 97.60  | 27.12.2011 | 53568 | 57888 |
| 28.12.2010 | 82.34 | 82.34  | 28.12.2011 | 53568 | 57888 |
| 29.12.2010 | 75.14 | 75.14  | 29.12.2011 | 53568 | 57888 |
| 30.12.2010 | 76.15 | 76.15  | 30.12.2011 | 53568 | 57888 |
| 31.12.2010 | 74.47 | 74.47  | 31.12.2011 | 53568 | 57888 |
| 01.01.2011 | 42.41 | 35.09  | 01.01.2012 | 43200 | 57888 |
| 02.01.2011 | 61.97 | 51.28  | 02.01.2012 | 43200 | 57888 |
| 03.01.2011 | 86.38 | 101.28 | 03.01.2012 | 43200 | 57888 |
| 04.01.2011 | 81.14 | 81.14  | 04.01.2012 | 43200 | 57888 |
| 05.01.2011 | 76.79 | 76.79  | 05.01.2012 | 43200 | 57888 |
| 06.01.2011 | 69.88 | 69.88  | 06.01.2012 | 43200 | 57888 |
| 07.01.2011 | 72.46 | 72.46  | 07.01.2012 | 43200 | 57888 |
| 08.01.2011 | 52.69 | 43.60  | 08.01.2012 | 43200 | 57888 |
| 09.01.2011 | 53.17 | 44.00  | 09.01.2012 | 43200 | 57888 |
| 10.01.2011 | 83.99 | 98.48  | 10.01.2012 | 43200 | 57888 |
| 11.01.2011 | 81.72 | 81.72  | 11.01.2012 | 43200 | 57888 |
| 12.01.2011 | 80.12 | 80.12  | 12.01.2012 | 43200 | 57888 |
| 13.01.2011 | 79.03 | 79.03  | 13.01.2012 | 43200 | 57888 |
| 14.01.2011 | 76.09 | 76.09  | 14.01.2012 | 43200 | 57888 |
| 15.01.2011 | 77.34 | 77.34  | 15.01.2012 | 43200 | 57888 |
| 16.01.2011 | 64.85 | 64.85  | 16.01.2012 | 43200 | 57888 |
| 17.01.2011 | 80.62 | 80.62  | 17.01.2012 | 43200 | 57888 |
| 18.01.2011 | 81.62 | 81.62  | 18.01.2012 | 43200 | 57888 |
| 19.01.2011 | 79.21 | 79.21  | 19.01.2012 | 43200 | 57888 |
| 20.01.2011 | 81.12 | 81.12  | 20.01.2012 | 43200 | 57888 |
| 21.01.2011 | 81.91 | 81.91  | 21.01.2012 | 43200 | 57888 |
| 22.01.2011 | 81.00 | 81.00  | 22.01.2012 | 43200 | 57888 |
| 23.01.2011 | 77.00 | 77.00  | 23.01.2012 | 43200 | 57888 |
| 24.01.2011 | 83.86 | 98.32  | 24.01.2012 | 43200 | 57888 |
| 25.01.2011 | 81.83 | 81.83  | 25.01.2012 | 43200 | 57888 |
| 26.01.2011 | 82.30 | 82.30  | 26.01.2012 | 43200 | 57888 |
| 27.01.2011 | 79.51 | 79.51  | 27.01.2012 | 43200 | 57888 |
| 28.01.2011 | 79.39 | 79.39  | 28.01.2012 | 43200 | 57888 |
| 29.01.2011 | 78.64 | 78.64  | 29.01.2012 | 43200 | 57888 |
| 30.01.2011 | 77.57 | 77.57  | 30.01.2012 | 43200 | 57888 |
| 31.01.2011 | 84.52 | 99.10  | 31.01.2012 | 43200 | 57888 |
| 01.02.2011 | 82.72 | 96.98  | 01.02.2012 | 40608 | 57888 |
| 02.02.2011 | 77.57 | 77.57  | 02.02.2012 | 40608 | 57888 |
| 03.02.2011 | 77.51 | 77.51  | 03.02.2012 | 40608 | 57888 |
| 04.02.2011 | 79.52 | 79.52  | 04.02.2012 | 40608 | 57888 |
| 05.02.2011 | 77.40 | 77.40  | 05.02.2012 | 40608 | 57888 |
| 06.02.2011 | 74.11 | 74.11  | 06.02.2012 | 40608 | 57888 |
| 07.02.2011 | 80.69 | 80.69  | 07.02.2012 | 40608 | 57888 |
| 08.02.2011 | 85.61 | 100.38 | 08.02.2012 | 40608 | 57888 |
| 09.02.2011 | 84.41 | 98.97  | 09.02.2012 | 40608 | 57888 |
| 10.02.2011 | 82.55 | 82.55  | 10.02.2012 | 40608 | 57888 |

|            |       |        |            |       |        |
|------------|-------|--------|------------|-------|--------|
| 11.02.2011 | 81.58 | 81.58  | 11.02.2012 | 40608 | 57888  |
| 12.02.2011 | 77.30 | 77.30  | 12.02.2012 | 40608 | 57888  |
| 13.02.2011 | 73.02 | 73.02  | 13.02.2012 | 40608 | 57888  |
| 14.02.2011 | 79.52 | 79.52  | 14.02.2012 | 40608 | 57888  |
| 15.02.2011 | 80.74 | 80.74  | 15.02.2012 | 40608 | 57888  |
| 16.02.2011 | 81.97 | 81.97  | 16.02.2012 | 40608 | 57888  |
| 17.02.2011 | 81.34 | 81.34  | 17.02.2012 | 40608 | 57888  |
| 18.02.2011 | 80.82 | 80.82  | 18.02.2012 | 40608 | 57888  |
| 19.02.2011 | 74.45 | 74.45  | 19.02.2012 | 40608 | 57888  |
| 20.02.2011 | 68.96 | 68.96  | 20.02.2012 | 40608 | 57888  |
| 21.02.2011 | 78.82 | 78.82  | 21.02.2012 | 40608 | 57888  |
| 22.02.2011 | 82.08 | 82.08  | 22.02.2012 | 40608 | 57888  |
| 23.02.2011 | 81.60 | 81.60  | 23.02.2012 | 40608 | 57888  |
| 24.02.2011 | 81.22 | 81.22  | 24.02.2012 | 40608 | 57888  |
| 25.02.2011 | 84.14 | 98.66  | 25.02.2012 | 40608 | 57888  |
| 26.02.2011 | 82.94 | 97.25  | 26.02.2012 | 40608 | 57888  |
| 27.02.2011 | 78.38 | 78.38  | 27.02.2012 | 40608 | 57888  |
| 28.02.2011 | 92.09 | 107.97 | 28.02.2012 | 40608 | 57888  |
| 01.03.2011 | 82.36 | 82.36  | 29.02.2012 | 40608 | 57888  |
| 02.03.2011 | 82.79 | 97.07  | 01.03.2012 | 44064 | 57888  |
| 03.03.2011 | 83.10 | 97.43  | 02.03.2012 | 44064 | 57888  |
| 04.03.2011 | 81.73 | 81.73  | 03.03.2012 | 44064 | 57888  |
| 05.03.2011 | 79.68 | 79.68  | 04.03.2012 | 44064 | 57888  |
| 06.03.2011 | 67.55 | 67.55  | 05.03.2012 | 44064 | 57888  |
| 07.03.2011 | 94.21 | 110.46 | 06.03.2012 | 44064 | 57888  |
| 08.03.2011 | 81.16 | 81.16  | 07.03.2012 | 44064 | 57888  |
| 09.03.2011 | 81.22 | 81.22  | 08.03.2012 | 44064 | 57888  |
| 10.03.2011 | 82.68 | 82.68  | 09.03.2012 | 44064 | 57888  |
| 11.03.2011 | 81.20 | 81.20  | 10.03.2012 | 44064 | 57888  |
| 12.03.2011 | 79.10 | 79.10  | 11.03.2012 | 44064 | 57888  |
| 13.03.2011 | 68.88 | 68.88  | 12.03.2012 | 44064 | 57888  |
| 14.03.2011 | 82.58 | 82.58  | 13.03.2012 | 44064 | 57888  |
| 15.03.2011 | 84.46 | 99.02  | 14.03.2012 | 44064 | 57888  |
| 16.03.2011 | 84.92 | 99.57  | 15.03.2012 | 44064 | 57888  |
| 17.03.2011 | 80.10 | 80.10  | 16.03.2012 | 44064 | 57888  |
| 18.03.2011 | 79.87 | 79.87  | 17.03.2012 | 44064 | 57888  |
| 19.03.2011 | 70.13 | 70.13  | 18.03.2012 | 44064 | 57888  |
| 20.03.2011 | 61.73 | 51.08  | 19.03.2012 | 44064 | 57888  |
| 21.03.2011 | 90.02 | 105.55 | 20.03.2012 | 44064 | 57888  |
| 22.03.2011 | 86.10 | 100.95 | 21.03.2012 | 44064 | 266976 |
| 23.03.2011 | 84.31 | 98.86  | 22.03.2012 | 44064 | 266976 |
| 24.03.2011 | 84.68 | 99.29  | 23.03.2012 | 44064 | 266976 |
| 25.03.2011 | 84.50 | 99.08  | 24.03.2012 | 44064 | 266976 |
| 26.03.2011 | 66.52 | 66.52  | 25.03.2012 | 44064 | 266976 |
| 27.03.2011 | 57.90 | 47.91  | 26.03.2012 | 44064 | 266976 |
| 28.03.2011 | 82.13 | 82.13  | 27.03.2012 | 44064 | 266976 |
| 29.03.2011 | 83.39 | 97.77  | 28.03.2012 | 44064 | 266976 |

|            |       |        |            |        |        |
|------------|-------|--------|------------|--------|--------|
| 30.03.2011 | 86.59 | 101.53 | 29.03.2012 | 44064  | 266976 |
| 31.03.2011 | 83.84 | 98.31  | 30.03.2012 | 44064  | 266976 |
| 01.04.2011 | 79.56 | 79.56  | 31.03.2012 | 44064  | 266976 |
| 02.04.2011 | 64.99 | 64.99  | 01.04.2012 | 76896  | 266976 |
| 03.04.2011 | 60.77 | 50.29  | 02.04.2012 | 76896  | 266976 |
| 04.04.2011 | 84.55 | 99.14  | 03.04.2012 | 76896  | 266976 |
| 05.04.2011 | 82.96 | 97.27  | 04.04.2012 | 76896  | 266976 |
| 06.04.2011 | 78.71 | 78.71  | 05.04.2012 | 76896  | 266976 |
| 07.04.2011 | 72.88 | 72.88  | 06.04.2012 | 76896  | 266976 |
| 08.04.2011 | 68.41 | 68.41  | 07.04.2012 | 76896  | 559872 |
| 09.04.2011 | 61.32 | 50.74  | 08.04.2012 | 76896  | 559872 |
| 10.04.2011 | 50.75 | 41.99  | 09.04.2012 | 76896  | 559872 |
| 11.04.2011 | 72.70 | 72.70  | 10.04.2012 | 76896  | 559872 |
| 12.04.2011 | 81.10 | 81.10  | 11.04.2012 | 76896  | 559872 |
| 13.04.2011 | 78.07 | 78.07  | 12.04.2012 | 76896  | 559872 |
| 14.04.2011 | 82.31 | 82.31  | 13.04.2012 | 76896  | 559872 |
| 15.04.2011 | 77.21 | 77.21  | 14.04.2012 | 76896  | 559872 |
| 16.04.2011 | 64.39 | 64.39  | 15.04.2012 | 76896  | 559872 |
| 17.04.2011 | 54.92 | 45.45  | 16.04.2012 | 76896  | 559872 |
| 18.04.2011 | 78.74 | 78.74  | 17.04.2012 | 76896  | 559872 |
| 19.04.2011 | 81.07 | 81.07  | 18.04.2012 | 76896  | 559872 |
| 20.04.2011 | 78.25 | 78.25  | 19.04.2012 | 76896  | 559872 |
| 21.04.2011 | 72.94 | 72.94  | 20.04.2012 | 76896  | 559872 |
| 22.04.2011 | 65.28 | 65.28  | 21.04.2012 | 76896  | 559872 |
| 23.04.2011 | 62.08 | 51.37  | 22.04.2012 | 76896  | 559872 |
| 24.04.2011 | 43.21 | 35.76  | 23.04.2012 | 76896  | 559872 |
| 25.04.2011 | 42.25 | 34.96  | 24.04.2012 | 76896  | 559872 |
| 26.04.2011 | 76.10 | 76.10  | 25.04.2012 | 76896  | 559872 |
| 27.04.2011 | 74.64 | 74.64  | 26.04.2012 | 76896  | 559872 |
| 28.04.2011 | 79.51 | 79.51  | 27.04.2012 | 76896  | 559872 |
| 29.04.2011 | 72.92 | 72.92  | 28.04.2012 | 76896  | 559872 |
| 30.04.2011 | 52.46 | 43.41  | 29.04.2012 | 76896  | 559872 |
| 01.05.2011 | 39.88 | 33.00  | 30.04.2012 | 76896  | 559872 |
| 02.05.2011 | 77.65 | 77.65  | 01.05.2012 | 266976 | 559872 |
| 03.05.2011 | 79.10 | 79.10  | 02.05.2012 | 266976 | 559872 |
| 04.05.2011 | 82.24 | 82.24  | 03.05.2012 | 266976 | 559872 |
| 05.05.2011 | 82.37 | 82.37  | 04.05.2012 | 266976 | 559872 |
| 06.05.2011 | 81.05 | 81.05  | 05.05.2012 | 266976 | 559872 |
| 07.05.2011 | 65.88 | 65.88  | 06.05.2012 | 266976 | 559872 |
| 08.05.2011 | 49.00 | 40.54  | 07.05.2012 | 266976 | 675648 |
| 09.05.2011 | 80.46 | 80.46  | 08.05.2012 | 266976 | 675648 |
| 10.05.2011 | 83.64 | 98.07  | 09.05.2012 | 266976 | 675648 |
| 11.05.2011 | 87.49 | 102.58 | 10.05.2012 | 266976 | 675648 |
| 12.05.2011 | 89.98 | 105.50 | 11.05.2012 | 266976 | 675648 |
| 13.05.2011 | 82.91 | 97.21  | 12.05.2012 | 266976 | 675648 |
| 14.05.2011 | 70.92 | 70.92  | 13.05.2012 | 266976 | 675648 |
| 15.05.2011 | 58.33 | 48.27  | 14.05.2012 | 266976 | 675648 |

|            |       |        |            |        |        |
|------------|-------|--------|------------|--------|--------|
| 16.05.2011 | 85.19 | 99.88  | 15.05.2012 | 266976 | 675648 |
| 17.05.2011 | 79.26 | 79.26  | 16.05.2012 | 266976 | 675648 |
| 18.05.2011 | 87.42 | 102.50 | 17.05.2012 | 266976 | 675648 |
| 19.05.2011 | 85.52 | 100.28 | 18.05.2012 | 266976 | 675648 |
| 20.05.2011 | 84.74 | 99.36  | 19.05.2012 | 266976 | 675648 |
| 21.05.2011 | 71.03 | 71.03  | 20.05.2012 | 266976 | 675648 |
| 22.05.2011 | 60.62 | 50.17  | 21.05.2012 | 266976 | 675648 |
| 23.05.2011 | 87.98 | 103.16 | 22.05.2012 | 266976 | 675648 |
| 24.05.2011 | 80.33 | 80.33  | 23.05.2012 | 266976 | 675648 |
| 25.05.2011 | 82.18 | 82.18  | 24.05.2012 | 266976 | 675648 |
| 26.05.2011 | 75.97 | 75.97  | 25.05.2012 | 266976 | 675648 |
| 27.05.2011 | 73.55 | 73.55  | 26.05.2012 | 266976 | 675648 |
| 28.05.2011 | 63.31 | 52.39  | 27.05.2012 | 266976 | 675648 |
| 29.05.2011 | 55.97 | 46.31  | 28.05.2012 | 266976 | 675648 |
| 30.05.2011 | 81.44 | 81.44  | 29.05.2012 | 266976 | 675648 |
| 31.05.2011 | 80.71 | 80.71  | 30.05.2012 | 266976 | 675648 |
| 01.06.2011 | 77.14 | 77.14  | 31.05.2012 | 266976 | 675648 |
| 02.06.2011 | 58.20 | 48.16  | 01.06.2012 | 559872 | 675648 |
| 03.06.2011 | 69.30 | 69.30  | 02.06.2012 | 559872 | 675648 |
| 04.06.2011 | 64.62 | 64.62  | 03.06.2012 | 559872 | 675648 |
| 05.06.2011 | 56.15 | 46.46  | 04.06.2012 | 559872 | 675648 |
| 06.06.2011 | 81.70 | 81.70  | 05.06.2012 | 559872 | 675648 |
| 07.06.2011 | 81.94 | 81.94  | 06.06.2012 | 559872 | 675648 |
| 08.06.2011 | 82.68 | 82.68  | 07.06.2012 | 559872 | 593568 |
| 09.06.2011 | 76.74 | 76.74  | 08.06.2012 | 559872 | 593568 |
| 10.06.2011 | 78.52 | 78.52  | 09.06.2012 | 559872 | 593568 |
| 11.06.2011 | 63.22 | 52.31  | 10.06.2012 | 559872 | 593568 |
| 12.06.2011 | 58.21 | 48.17  | 11.06.2012 | 559872 | 593568 |
| 13.06.2011 | 61.51 | 50.90  | 12.06.2012 | 559872 | 593568 |
| 14.06.2011 | 82.01 | 82.01  | 13.06.2012 | 559872 | 593568 |
| 15.06.2011 | 83.90 | 98.38  | 14.06.2012 | 559872 | 593568 |
| 16.06.2011 | 80.89 | 80.89  | 15.06.2012 | 559872 | 593568 |
| 17.06.2011 | 74.48 | 74.48  | 16.06.2012 | 559872 | 593568 |
| 18.06.2011 | 62.04 | 51.34  | 17.06.2012 | 559872 | 593568 |
| 19.06.2011 | 40.58 | 33.58  | 18.06.2012 | 559872 | 593568 |
| 20.06.2011 | 72.68 | 72.68  | 19.06.2012 | 559872 | 593568 |
| 21.06.2011 | 77.06 | 77.06  | 20.06.2012 | 559872 | 593568 |
| 22.06.2011 | 77.17 | 77.17  | 21.06.2012 | 559872 | 593568 |
| 23.06.2011 | 65.21 | 65.21  | 22.06.2012 | 559872 | 593568 |
| 24.06.2011 | 67.52 | 67.52  | 23.06.2012 | 559872 | 593568 |
| 25.06.2011 | 64.26 | 64.26  | 24.06.2012 | 559872 | 593568 |
| 26.06.2011 | 54.42 | 45.03  | 25.06.2012 | 559872 | 593568 |
| 27.06.2011 | 77.00 | 77.00  | 26.06.2012 | 559872 | 593568 |
| 28.06.2011 | 73.55 | 73.55  | 27.06.2012 | 559872 | 593568 |
| 29.06.2011 | 72.10 | 72.10  | 28.06.2012 | 559872 | 593568 |
| 30.06.2011 | 68.22 | 68.22  | 29.06.2012 | 559872 | 593568 |
| 01.07.2011 | 66.44 | 66.44  | 30.06.2012 | 559872 | 593568 |

|            |       |       |            |        |        |
|------------|-------|-------|------------|--------|--------|
| 02.07.2011 | 54.06 | 44.73 | 01.07.2012 | 675648 | 593568 |
| 03.07.2011 | 41.34 | 34.21 | 02.07.2012 | 675648 | 593568 |
| 04.07.2011 | 73.07 | 73.07 | 03.07.2012 | 675648 | 593568 |
| 05.07.2011 | 75.54 | 75.54 | 04.07.2012 | 675648 | 593568 |
| 06.07.2011 | 71.68 | 71.68 | 05.07.2012 | 675648 | 593568 |
| 07.07.2011 | 73.80 | 73.80 | 06.07.2012 | 675648 | 593568 |
| 08.07.2011 | 69.70 | 69.70 | 07.07.2012 | 675648 | 593568 |
| 09.07.2011 | 60.28 | 49.88 | 08.07.2012 | 675648 | 338638 |
| 10.07.2011 | 55.66 | 46.06 | 09.07.2012 | 675648 | 338638 |
| 11.07.2011 | 73.38 | 73.38 | 10.07.2012 | 675648 | 338638 |
| 12.07.2011 | 72.62 | 72.62 | 11.07.2012 | 675648 | 338638 |
| 13.07.2011 | 70.30 | 70.30 | 12.07.2012 | 675648 | 338638 |
| 14.07.2011 | 64.56 | 64.56 | 13.07.2012 | 675648 | 338638 |
| 15.07.2011 | 63.20 | 52.30 | 14.07.2012 | 675648 | 338638 |
| 16.07.2011 | 60.78 | 50.30 | 15.07.2012 | 675648 | 338638 |
| 17.07.2011 | 48.71 | 40.31 | 16.07.2012 | 675648 | 338638 |
| 18.07.2011 | 67.74 | 67.74 | 17.07.2012 | 675648 | 338638 |
| 19.07.2011 | 68.05 | 68.05 | 18.07.2012 | 675648 | 338638 |
| 20.07.2011 | 69.88 | 69.88 | 19.07.2012 | 675648 | 338638 |
| 21.07.2011 | 64.96 | 64.96 | 20.07.2012 | 675648 | 338638 |
| 22.07.2011 | 61.18 | 50.62 | 21.07.2012 | 675648 | 338638 |
| 23.07.2011 | 51.36 | 42.50 | 22.07.2012 | 675648 | 338638 |
| 24.07.2011 | 32.39 | 26.80 | 23.07.2012 | 675648 | 338638 |
| 25.07.2011 | 65.12 | 65.12 | 24.07.2012 | 675648 | 338638 |
| 26.07.2011 | 67.66 | 67.66 | 25.07.2012 | 675648 | 338638 |
| 27.07.2011 | 65.41 | 65.41 | 26.07.2012 | 675648 | 338638 |
| 28.07.2011 | 63.46 | 52.51 | 27.07.2012 | 675648 | 338638 |
| 29.07.2011 | 60.56 | 50.12 | 28.07.2012 | 675648 | 338638 |
| 30.07.2011 | 53.36 | 44.16 | 29.07.2012 | 675648 | 338638 |
| 31.07.2011 | 48.44 | 40.09 | 30.07.2012 | 675648 | 338638 |
| 01.08.2011 | 62.41 | 51.65 | 31.07.2012 | 675648 | 338638 |
| 02.08.2011 | 63.58 | 52.61 | 01.08.2012 | 593568 | 338638 |
| 03.08.2011 | 66.36 | 66.36 | 02.08.2012 | 593568 | 338638 |
| 04.08.2011 | 64.82 | 64.82 | 03.08.2012 | 593568 | 338638 |
| 05.08.2011 | 64.96 | 64.96 | 04.08.2012 | 593568 | 338638 |
| 06.08.2011 | 56.87 | 47.06 | 05.08.2012 | 593568 | 338638 |
| 07.08.2011 | 38.72 | 32.04 | 06.08.2012 | 593568 | 338638 |
| 08.08.2011 | 61.34 | 50.76 | 07.08.2012 | 593568 | 169344 |
| 09.08.2011 | 57.46 | 47.54 | 08.08.2012 | 593568 | 169344 |
| 10.08.2011 | 60.89 | 50.38 | 09.08.2012 | 593568 | 169344 |
| 11.08.2011 | 62.39 | 51.63 | 10.08.2012 | 593568 | 169344 |
| 12.08.2011 | 64.01 | 52.97 | 11.08.2012 | 593568 | 169344 |
| 13.08.2011 | 61.84 | 51.17 | 12.08.2012 | 593568 | 169344 |
| 14.08.2011 | 51.73 | 42.81 | 13.08.2012 | 593568 | 169344 |
| 15.08.2011 | 62.64 | 51.83 | 14.08.2012 | 593568 | 169344 |
| 16.08.2011 | 68.02 | 68.02 | 15.08.2012 | 593568 | 169344 |
| 17.08.2011 | 67.19 | 67.19 | 16.08.2012 | 593568 | 169344 |

|            |       |        |            |        |        |
|------------|-------|--------|------------|--------|--------|
| 18.08.2011 | 69.71 | 69.71  | 17.08.2012 | 593568 | 169344 |
| 19.08.2011 | 65.45 | 65.45  | 18.08.2012 | 593568 | 169344 |
| 20.08.2011 | 61.36 | 50.77  | 19.08.2012 | 593568 | 169344 |
| 21.08.2011 | 54.86 | 45.40  | 20.08.2012 | 593568 | 169344 |
| 22.08.2011 | 81.95 | 81.95  | 21.08.2012 | 593568 | 169344 |
| 23.08.2011 | 75.54 | 75.54  | 22.08.2012 | 593568 | 169344 |
| 24.08.2011 | 80.99 | 80.99  | 23.08.2012 | 593568 | 169344 |
| 25.08.2011 | 84.86 | 99.50  | 24.08.2012 | 593568 | 169344 |
| 26.08.2011 | 77.28 | 77.28  | 25.08.2012 | 593568 | 169344 |
| 27.08.2011 | 61.82 | 51.16  | 26.08.2012 | 593568 | 169344 |
| 28.08.2011 | 50.69 | 41.94  | 27.08.2012 | 593568 | 169344 |
| 29.08.2011 | 67.80 | 67.80  | 28.08.2012 | 593568 | 169344 |
| 30.08.2011 | 75.37 | 75.37  | 29.08.2012 | 593568 | 169344 |
| 31.08.2011 | 79.42 | 79.42  | 30.08.2012 | 593568 | 169344 |
| 01.09.2011 | 77.95 | 77.95  | 31.08.2012 | 593568 | 169344 |
| 02.09.2011 | 77.17 | 77.17  | 01.09.2012 | 338638 | 169344 |
| 03.09.2011 | 67.22 | 67.22  | 02.09.2012 | 338638 | 169344 |
| 04.09.2011 | 56.56 | 46.80  | 03.09.2012 | 338638 | 169344 |
| 05.09.2011 | 76.75 | 76.75  | 04.09.2012 | 338638 | 169344 |
| 06.09.2011 | 64.27 | 64.27  | 05.09.2012 | 338638 | 169344 |
| 07.09.2011 | 64.30 | 64.30  | 06.09.2012 | 338638 | 169344 |
| 08.09.2011 | 69.42 | 69.42  | 07.09.2012 | 338638 | 88992  |
| 09.09.2011 | 78.61 | 78.61  | 08.09.2012 | 338638 | 88992  |
| 10.09.2011 | 66.46 | 66.46  | 09.09.2012 | 338638 | 88992  |
| 11.09.2011 | 55.22 | 45.70  | 10.09.2012 | 338638 | 88992  |
| 12.09.2011 | 67.27 | 67.27  | 11.09.2012 | 338638 | 88992  |
| 13.09.2011 | 70.25 | 70.25  | 12.09.2012 | 338638 | 88992  |
| 14.09.2011 | 68.16 | 68.16  | 13.09.2012 | 338638 | 88992  |
| 15.09.2011 | 75.24 | 75.24  | 14.09.2012 | 338638 | 88992  |
| 16.09.2011 | 78.23 | 78.23  | 15.09.2012 | 338638 | 88992  |
| 17.09.2011 | 65.33 | 65.33  | 16.09.2012 | 338638 | 88992  |
| 18.09.2011 | 62.22 | 51.49  | 17.09.2012 | 338638 | 88992  |
| 19.09.2011 | 86.03 | 100.87 | 18.09.2012 | 338638 | 88992  |
| 20.09.2011 | 80.17 | 80.17  | 19.09.2012 | 338638 | 88992  |
| 21.09.2011 | 76.70 | 76.70  | 20.09.2012 | 338638 | 88992  |
| 22.09.2011 | 76.34 | 76.34  | 21.09.2012 | 338638 | 88992  |
| 23.09.2011 | 75.00 | 75.00  | 22.09.2012 | 338638 | 88992  |
| 24.09.2011 | 62.65 | 51.84  | 23.09.2012 | 338638 | 88992  |
| 25.09.2011 | 53.88 | 44.59  | 24.09.2012 | 338638 | 88992  |
| 26.09.2011 | 75.62 | 75.62  | 25.09.2012 | 338638 | 88992  |
| 27.09.2011 | 77.70 | 77.70  | 26.09.2012 | 338638 | 88992  |
| 28.09.2011 | 78.05 | 78.05  | 27.09.2012 | 338638 | 88992  |
| 29.09.2011 | 79.75 | 79.75  | 28.09.2012 | 338638 | 88992  |
| 30.09.2011 | 75.11 | 75.11  | 29.09.2012 | 338638 | 88992  |
|            |       |        | 30.09.2012 | 338638 | 88992  |
